# Supplementary material for: Impact of prior therapies and subsequent transplantation on outcomes in adult patients with relapsed or refractory B-cell acute lymphoblastic leukemia treated with brexucabtagene autoleucel in ZUMA-3
Source: PubMed Central journal article supplement — J Immunother Cancer. 2023 Aug 30;11(8):e007118. doi: 10.1136/jitc-2023-007118 (PMC10471850; doi:10.1136/jitc-2023-007118), 2023-08-30
Supplement: jitc-2023-007118supp001.pdf [file jitc-2023-007118supp001.pdf]

Shah, et al. ZUMA-3 2-year follow-up treatment subgroup manuscript – *JITC*

## **SUPPLEMENTARY APPENDIX**

### **TABLE OF CONTENTS**

|                                                                                                                                                                                                                                                                         |           |
|-------------------------------------------------------------------------------------------------------------------------------------------------------------------------------------------------------------------------------------------------------------------------|-----------|
| <b>SUPPLEMENTARY APPENDIX.....</b>                                                                                                                                                                                                                                      | <b>1</b>  |
| <b>Supplementary Methods .....</b>                                                                                                                                                                                                                                      | <b>2</b>  |
| Eligibility criteria .....                                                                                                                                                                                                                                              | 2         |
| Procedures .....                                                                                                                                                                                                                                                        | 2         |
| Outcomes.....                                                                                                                                                                                                                                                           | 2         |
| <b>Supplementary Tables .....</b>                                                                                                                                                                                                                                       | <b>3</b>  |
| Table S1. Summary of subsequent anticancer therapies received by Phase 1 and 2 patients with response to brexu-cel who proceeded to subsequent therapies, by number of prior therapies .....                                                                            | 3         |
| Table S2. Baseline disease and patient characteristics in Phase 2 treated patients (N=55) by prior therapies ...                                                                                                                                                        | 4         |
| Table S3. Summary of cytokine release syndrome and neurological events in Phase 2 treated patients (N=55) ..                                                                                                                                                            | 6         |
| Table S4. Summary of best overall responses for patients with blinatumomab as last prior therapy in ZUMA-3 .....                                                                                                                                                        | 7         |
| Table S5. Baseline disease and patient characteristics in Phase 1 and 2 responders by subsequent alloSCT .....                                                                                                                                                          | 8         |
| Table S6. Peak and AUC <sub>0-28</sub> CAR T-cell levels in pooled Phase 1 and 2 treated patients by bone marrow blast levels at baseline in patients with and without prior blinatumomab .....                                                                         | 9         |
| Table S7. Peak and AUC <sub>0-28</sub> CAR T-cell levels in pooled Phase 1 and 2 treated patients by BM blast levels at baseline in patients with and without prior inotuzumab .....                                                                                    | 10        |
| <b>Supplementary Figures.....</b>                                                                                                                                                                                                                                       | <b>11</b> |
| Figure S1: Duration of remission (not censored at subsequent alloSCT; A) and relapse-free survival (not censored at subsequent alloSCT; B) in pooled Phase 1 and 2 treated patients by prior number of therapy lines .....                                              | 11        |
| Figure S2: Relapse-free survival (censored at subsequent alloSCT) in pooled Phase 1 and 2 treated patients by (A) prior number of therapy lines, (B) prior blinatumomab exposure, (C) prior inotuzumab exposure, and (D) prior alloSCT exposure .....                   | 13        |
| Figure S3: Duration of remission (censored at subsequent alloSCT) in Phase 2 treated patients by (A) prior number of therapy lines, (B) prior blinatumomab exposure, (C) prior inotuzumab exposure, and (D) prior alloSCT exposure .....                                | 17        |
| Figure S4: Relapse-free survival (censored at subsequent alloSCT) in Phase 2 treated patients by (A) prior number of therapy lines, (B) prior blinatumomab exposure, (C) prior inotuzumab exposure, and (D) prior alloSCT exposure .....                                | 21        |
| Figure S5: Overall survival in Phase 2 treated patients by (A) prior number of therapy lines, (B) prior blinatumomab exposure, (C) prior inotuzumab exposure, and (D) prior alloSCT exposure .....                                                                      | 25        |
| Figure S6: Duration of remission (not censored at subsequent alloSCT) and overall survival in Phase 2 treated patients by subsequent alloSCT (A, B) and in Phase 2 treated patients with responses who did not receive prior alloSCT by subsequent alloSCT (C, D) ..... | 29        |
| Figure S7: Peak and AUC <sub>0-28</sub> CAR T-cell levels in pooled Phase 1 and 2 treated patients by blinatumomab as last prior therapy .....                                                                                                                          | 33        |
| <b>Supplementary References.....</b>                                                                                                                                                                                                                                    | <b>34</b> |

Shah, et al. ZUMA-3 2-year follow-up treatment subgroup manuscript – *JITC*

### **Supplementary Methods**

#### **Eligibility criteria**

Full eligibility requirements were previously reported.<sup>1,2</sup>

#### **Procedures**

Disease and adverse event monitoring and toxicity management were previously described.<sup>1,2</sup>

#### **Outcomes**

Definitions for duration of remission (DOR), overall survival (OS), and relapse-free survival (RFS) were previously reported.<sup>1,2</sup> Briefly, DOR was defined as the time from reaching complete remission (CR) or CR with incomplete hematological recovery (CRi) (central assessment) to relapse or death without documented relapse. The calculation of DOR did not include disease assessments occurring after new anticancer therapies, including alloSCT. RFS was defined as the time from infusion of KTE-X19 to the date of relapse or death from any cause. Patients were evaluated as having an RFS event at Day 0 if they did not achieve CR or CRi as of the data cutoff date; as such, patients in the intention-to-treat population who were not infused would also have been considered to have an event at Day 0. For DOR and RFS, sensitivity analyses were performed in which disease assessments obtained after alloSCT were included in the derivation of DOR and RFS.

Shah, et al. ZUMA-3 2-year follow-up treatment subgroup manuscript – *JITC*

### Supplementary Tables

**Table S1. Summary of subsequent anticancer therapies received by Phase 1 and 2 patients with response to brexu-cel who proceeded to subsequent therapies, by number of prior therapies**

| Reported therapies                           | Patients with 1 prior therapy (n=4) | Patients with ≥2 prior therapies (n=4) |
|----------------------------------------------|-------------------------------------|----------------------------------------|
| Dexamethasone                                | 3 (75)                              | 1 (25)                                 |
| Inotuzumab                                   | 3 (75)                              | 0                                      |
| Vincristine                                  | 3 (75)                              | 0                                      |
| Cyclophosphamide                             | 2 (50)                              | 2 (50)                                 |
| Blinatumomab                                 | 1 (25)                              | 0                                      |
| Blinatumomab <sup>a</sup>                    | 1 (25)                              | 0                                      |
| Ponatinib                                    | 1 (25)                              | 0                                      |
| Rituximab                                    | 1 (25)                              | 0                                      |
| Inotuzumab Ozogamicin                        | 0                                   | 2 (50)                                 |
| Antithymocyte Immunoglobulin (rabbit)        | 0                                   | 1 (25)                                 |
| Cytarabine                                   | 0                                   | 1 (25)                                 |
| Etoposide                                    | 0                                   | 1 (25)                                 |
| Fludarabine                                  | 0                                   | 1 (25)                                 |
| Fludarabine Phosphate                        | 0                                   | 1 (25)                                 |
| Haploid Allo Tx <sup>a</sup>                 | 0                                   | 1 (25)                                 |
| Hydrocortisone                               | 0                                   | 1 (25)                                 |
| Inotuzumab Ozogamicin (CMC-544) <sup>a</sup> | 0                                   | 1 (25)                                 |
| Investigational antineoplastic drugs         | 0                                   | 1 (25)                                 |
| Melphalan                                    | 0                                   | 1 (25)                                 |
| Methotrexate                                 | 0                                   | 1 (25)                                 |
| Ponatinib Hydrochloride                      | 0                                   | 1 (25)                                 |
| Thiotepa                                     | 0                                   | 1 (25)                                 |
| Tisagenlecleucel-T                           | 0                                   | 1 (25)                                 |

Subsequent anticancer therapies are coded using WHO-Drug Dictionary March 2021 version.

Therapies taken during the retreatment period are excluded.

<sup>a</sup> Indicates reported name of therapy.

Shah, et al. ZUMA-3 2-year follow-up treatment subgroup manuscript – JITC

**Table S2. Baseline disease and patient characteristics in Phase 2 treated patients (N=55) by prior therapies**

|                                                                                  | Phase 2 patients (N=55) | Prior number of therapies |            | Prior blinatumomab |              | Prior inotuzumab |            | Prior alloSCT |              |
|----------------------------------------------------------------------------------|-------------------------|---------------------------|------------|--------------------|--------------|------------------|------------|---------------|--------------|
|                                                                                  |                         | 1 (n=10)                  | ≥2 (n=45)  | Yes (n=25)         | No (n=30)    | Yes (n=12)       | No (n=43)  | Yes (n=23)    | No (n=32)    |
| Age, median (range), years                                                       | 40 (19-84)              | 38.5 (21-65)              | 41 (19-84) | 38 (19-84)         | 42.5 (19-73) | 45 (19-84)       | 39 (19-73) | 38 (19-68)    | 45.5 (19-84) |
| ≥65 years, n (%)                                                                 | 9 (16)                  | 1 (10)                    | 7 (16)     | 3 (12)             | 5 (17)       | 2 (17)           | 6 (14)     | 2 (9)         | 6 (19)       |
| Male, n (%)                                                                      | 33 (60)                 | 6 (60)                    | 27 (60)    | 16 (64)            | 17 (57)      | 10 (83)          | 23 (53)    | 12 (52)       | 21 (66)      |
| ECOG PS of 1, n (%)                                                              | 39 (71)                 | 6 (60)                    | 33 (73)    | 18 (72)            | 21 (70)      | 8 (67)           | 31 (72)    | 16 (70)       | 23 (72)      |
| Philadelphia chromosome-positive, n (%)                                          | 15 (27)                 | 2 (20)                    | 13 (29)    | 5 (20)             | 10 (33)      | 4 (33)           | 11 (26)    | 8 (35)        | 7 (22)       |
| Extramedullary disease at screening, n (%)                                       | 6 (11)                  | 0                         | 6 (13)     | 4 (16)             | 2 (7)        | 1 (8)            | 5 (12)     | 2 (9)         | 4 (13)       |
| CNS-1 disease at baseline, n (%)                                                 | 55 (100)                | 10 (100)                  | 45 (100)   | 25 (100)           | 30 (100)     | 12 (100)         | 43 (100)   | 23 (100)      | 32 (100)     |
| Bone marrow blasts at baseline, median (range) %                                 | 60 (0-98)               | 47 (0-73)                 | 65 (2-98)  | 70 (2-98)          | 50 (0-96)    | 74 (2-98)        | 50 (0-97)  | 72 (2-96)     | 50 (0-98)    |
| >25%, n (%)                                                                      | 40 (73)                 | 7 (70)                    | 33 (73)    | 18 (72)            | 22 (73)      | 10 (83)          | 30 (70)    | 17 (74)       | 23 (72)      |
| <b>CD19 lymphoblast baseline category per central lab, %</b>                     |                         |                           |            |                    |              |                  |            |               |              |
| ≥95                                                                              | 41 (75)                 | 8 (80)                    | 33 (73)    | 18 (72)            | 23 (77)      | 9 (75)           | 32 (74)    | 17 (74)       | 24 (75)      |
| <95                                                                              | 12 (22)                 | 2 (20)                    | 10 (22)    | 5 (20)             | 7 (23)       | 3 (25)           | 9 (21)     | 5 (22)        | 7 (22)       |
| Missing                                                                          | 2 (4)                   | 0                         | 2 (4)      | 2 (8)              | 0            | 0                | 2 (5)      | 1 (4)         | 1 (3)        |
| Number of prior therapies, median (range)                                        | 2 (1-8)                 | 1 (1-1)                   | 3 (2-8)    | 3 (1-8)            | 2 (1-5)      | 3.5 (2-5)        | 2 (1-8)    | 3 (1-8)       | 2 (1-4)      |
| ≥3 prior lines of therapy, n (%)                                                 | 26 (47)                 | 0                         | 26 (58)    | 15 (60)            | 11 (37)      | 11 (92)          | 15 (35)    | 16 (70)       | 10 (31)      |
| Prior blinatumomab, n (%)                                                        | 25 (45)                 | 1 (10)                    | 24 (53)    | 25 (100)           | 0            | 6 (50)           | 19 (44)    | 11 (48)       | 14 (44)      |
| Prior inotuzumab, n (%)                                                          | 12 (22)                 | 0                         | 12 (27)    | 6 (24)             | 6 (20)       | 12 (100)         | 0          | 5 (22)        | 7 (22)       |
| Prior alloSCT, n (%)                                                             | 23 (42)                 | 1 (10)                    | 22 (49)    | 11 (44)            | 12 (40)      | 5 (42)           | 18 (42)    | 23 (100)      | 0            |
| Prior radiotherapy, n (%)                                                        | 13 (24)                 | 2 (20)                    | 11 (24)    | 8 (32)             | 5 (17)       | 3 (25)           | 10 (23)    | 9 (39)        | 4 (13)       |
| Primary refractory, n (%)                                                        | 18 (33)                 | 4 (40)                    | 14 (31)    | 8 (32)             | 10 (33)      | 2 (17)           | 16 (37)    | 6 (26)        | 12 (38)      |
| Relapsed or refractory to second or greater line of therapy <sup>a</sup> , n (%) | 43 (78)                 | 0                         | 43 (96)    | 23 (92)            | 20 (67)      | 12 (100)         | 31 (72)    | 12 (91)       | 22 (69)      |
| First relapse with remission ≤12.0 months, n (%)                                 | 16 (29)                 | 5 (50)                    | 11 (24)    | 5 (20)             | 11 (37)      | 0                | 16 (37)    | 5 (22)        | 11 (34)      |

Shah, et al. ZUMA-3 2-year follow-up treatment subgroup manuscript – *JITC*

|                                                               |         |        |         |         |         |        |         |          |                    |
|---------------------------------------------------------------|---------|--------|---------|---------|---------|--------|---------|----------|--------------------|
| <b>Relapsed or refractory post-alloSCT<sup>b</sup>, n (%)</b> | 24 (44) | 2 (20) | 22 (49) | 11 (44) | 13 (43) | 5 (42) | 19 (44) | 23 (100) | 1 (3) <sup>b</sup> |
| <b>Response to the last prior therapy, n (%)</b>              |         |        |         |         |         |        |         |          |                    |
| CR                                                            | 16 (29) | 5 (50) | 11 (24) | 7 (28)  | 9 (30)  | 1 (8)  | 15 (35) | 9 (39)   | 7 (22)             |
| Cri                                                           | 1 (2)   | 1 (10) | 0       | 0       | 1 (3)   | 0      | 1 (2)   | 0        | 1 (3)              |
| PR                                                            | 2 (4)   | 0      | 2 (4)   | 1 (4)   | 1 (3)   | 0      | 2 (5)   | 1 (4)    | 1 (3)              |
| NR                                                            | 20 (36) | 3 (30) | 17 (38) | 7 (28)  | 13 (43) | 5 (42) | 15 (35) | 4 (17)   | 16 (50)            |
| PD                                                            | 10 (18) | 1 (10) | 9 (20)  | 7 (28)  | 3 (10)  | 2 (17) | 8 (19)  | 4 (17)   | 6 (19)             |
| Not evaluated                                                 | 6 (11)  | 0      | 6 (13)  | 3 (12)  | 3 (10)  | 4 (33) | 2 (5)   | 5 (22)   | 1 (3)              |

<sup>a</sup> Two patients with relapsed or refractory disease to second or greater lines of therapy were erroneously not marked in the eCRF as such. <sup>b</sup> One patient had prior autologous transplantation but was erroneously marked in the eCRF as relapsed/refractory disease after alloSCT.

alloSCT, allogeneic stem cell transplantation; CNS, central nervous system; CR, complete remission; CRi, complete remission with incomplete hematological recovery; ECOG PS, Eastern Cooperative Oncology Group performance status; NR, no response; PD, progressive disease; PR, partial response.

Shah, et al. ZUMA-3 2-year follow-up treatment subgroup manuscript – *JITC*

**Table S3. Summary of cytokine release syndrome and neurological events in Phase 2 treated patients (N=55)**

|                                         | Prior number of therapies |              | Prior blinatumomab |              | Prior inotuzumab |              | Prior alloSCT |              |
|-----------------------------------------|---------------------------|--------------|--------------------|--------------|------------------|--------------|---------------|--------------|
|                                         | 1<br>(n=10)               | ≥2<br>(n=45) | Yes<br>(n=25)      | No<br>(n=30) | Yes<br>(n=12)    | No<br>(n=43) | Yes<br>(n=23) | No<br>(n=32) |
| <b>Cytokine release syndrome, n (%)</b> | 9 (90)                    | 40 (89)      | 21 (84)            | 28 (93)      | 11 (92)          | 38 (88)      | 20 (87)       | 29 (91)      |
| Grade 1                                 | 4 (40)                    | 7 (16)       | 2 (8)              | 9 (30)       | 2 (17)           | 9 (21)       | 5 (22)        | 6 (19)       |
| Grade 2                                 | 4 (40)                    | 21 (47)      | 13 (52)            | 12 (40)      | 6 (50)           | 19 (44)      | 11 (48)       | 14 (44)      |
| Grade ≥3                                | 1 (10)                    | 12 (27)      | 6 (24)             | 7 (23)       | 3 (25)           | 10 (23)      | 4 (17)        | 9 (28)       |
| <b>Neurological events, n (%)</b>       | 6 (60)                    | 27 (60)      | 14 (56)            | 19 (63)      | 9 (75)           | 24 (56)      | 12 (52)       | 21 (66)      |
| Grade 1                                 | 2 (20)                    | 4 (9)        | 2 (8)              | 4 (13)       | 3 (25)           | 3 (7)        | 2 (9)         | 4 (13)       |
| Grade 2                                 | 1 (10)                    | 12 (27)      | 7 (28)             | 6 (20)       | 3 (25)           | 10 (23)      | 4 (17)        | 9 (28)       |
| Grade ≥3                                | 3 (30)                    | 11 (24)      | 5 (20)             | 9 (30)       | 3 (25)           | 11 (26)      | 6 (26)        | 8 (25)       |

<sup>a</sup> Cytokine release syndrome is graded per the revised grading system proposed by Lee et al (2014).<sup>3</sup> <sup>b</sup> Neurological events are identified based on a modification of criteria proposed by Topp and colleagues (Topp et al 2015).<sup>4</sup>

alloSCT, allogeneic stem cell transplantation.

Shah, et al. ZUMA-3 2-year follow-up treatment subgroup manuscript – *JITC*

**Table S4. Summary of best overall responses for patients with blinatumomab as last prior therapy in ZUMA-3**

|                                                                | N  | Best response to brexu-cel |           |            |             |           |
|----------------------------------------------------------------|----|----------------------------|-----------|------------|-------------|-----------|
|                                                                |    | Overall CR/CRI rate, n (%) | CR, n (%) | CRI, n (%) | BFBM, n (%) | NR, n (%) |
| Phase 1 and 2 patients with blinatumomab as last prior therapy | 17 | 12 (71)                    | 10 (59)   | 2 (12)     | 3 (18)      | 2 (12)    |
| <b>Best response to prior blinatumomab<sup>a</sup></b>         |    |                            |           |            |             |           |
| CR                                                             | 6  | 3 (50)                     | 3 (50)    | 0          | 1 (17)      | 2 (33)    |
| PR                                                             | 1  | 1 (100)                    | 0         | 1 (100)    | 0           | 0         |
| NR                                                             | 3  | 3 (100)                    | 2 (67)    | 1 (33)     | 0           | 0         |
| PD                                                             | 7  | 5 (71)                     | 5 (71)    | 0          | 2 (29)      | 0         |

<sup>a</sup> Data regarding duration of blinatumomab therapy received is not available.

BFBM, blast-free hypoplastic or aplastic bone marrow; brexu-cel, brexucabtagene autoleucel; CR, complete remission; CRI, CR with incomplete hematologic recovery; NR, no response; PD, progressive disease; PR, partial response.

Shah, et al. ZUMA-3 2-year follow-up treatment subgroup manuscript – *JITC*

**Table S5. Baseline disease and patient characteristics in Phase 1 and 2 responders by subsequent alloSCT**

|                                                                                  | Responders with subsequent<br>alloSCT (n=14) | Responders without subsequent<br>alloSCT (n=43) |
|----------------------------------------------------------------------------------|----------------------------------------------|-------------------------------------------------|
| ECOG PS of 1, n (%)                                                              | 8 (57)                                       | 30 (70)                                         |
| Philadelphia chromosome-positive, n (%)                                          | 2 (14)                                       | 12 (28)                                         |
| Extramedullary disease at screening, n (%)                                       | 1 (7)                                        | 4 (9)                                           |
| CNS-1 disease at baseline, n (%)                                                 | 14 (100)                                     | 43 (100)                                        |
| Bone marrow blasts at baseline, median (range) %                                 | 37 (2-88)                                    | 60 (0-97)                                       |
| >25%, n (%)                                                                      | 9 (64)                                       | 30 (70)                                         |
| Number of prior therapies, median (range)                                        | 2 (1-5)                                      | 3 (1-8)                                         |
| Prior blinatumomab, n (%)                                                        | 5 (36)                                       | 19 (44)                                         |
| Prior inotuzumab, n (%)                                                          | 1 (7)                                        | 9 (21)                                          |
| Prior alloSCT, n (%)                                                             | 1 (7)                                        | 21 (49)                                         |
| Prior radiotherapy, n (%)                                                        | 2 (14)                                       | 14 (33)                                         |
| Primary refractory, n (%)                                                        | 6 (43)                                       | 12 (28)                                         |
| Relapsed or refractory to second or greater line of therapy <sup>a</sup> , n (%) | 11 (79)                                      | 30 (70)                                         |
| First relapse with remission ≤12.0 months, n (%)                                 | 4 (29)                                       | 11 (26)                                         |
| Relapsed or refractory post-alloSCT <sup>b</sup> , n (%)                         | 1 (7)                                        | 22 (51)                                         |
| Response to the last prior therapy, n (%)                                        |                                              |                                                 |
| CR                                                                               | 2 (14)                                       | 16 (37)                                         |
| CRi                                                                              | 1 (7)                                        | 1 (2)                                           |
| PR                                                                               | 1 (7)                                        | 0                                               |
| NR                                                                               | 9 (64)                                       | 11 (26)                                         |
| PD                                                                               | 1 (7)                                        | 11 (26)                                         |
| Not evaluated                                                                    | 0                                            | 4 (9)                                           |

<sup>a</sup> Two patients with relapsed or refractory disease to second or greater lines of therapy were

erroneously not marked in the eCRF as such. <sup>b</sup> One patient had prior autologous transplantation but was erroneously marked in the eCRF as relapsed/refractory disease after alloSCT.

alloSCT, allogeneic stem cell transplantation; CNS, central nervous system; CR, complete remission; CRi, complete remission with incomplete hematological recovery; ECOG PS, Eastern Cooperative Oncology Group performance status; NR, no response; PD, progressive disease; PR, partial response.



Shah, et al. ZUMA-3 2-year follow-up treatment subgroup manuscript – *JITC*

**Table S6. Peak and AUC<sub>0-28</sub> CAR T-cell levels in pooled Phase 1 and 2 treated patients by bone marrow blast levels at baseline in patients with and without prior blinatumomab**

| Baseline BM blast % | Prior blinatumomab (Yes) |                            |                                                  | Prior blinatumomab (No) |                            |                                                  |
|---------------------|--------------------------|----------------------------|--------------------------------------------------|-------------------------|----------------------------|--------------------------------------------------|
|                     | N                        | Median peak CAR T cells/ul | Median AUC <sub>0-28</sub> CAR T cells/ul × days | N                       | Median peak CAR T cells/ul | Median AUC <sub>0-28</sub> CAR T cells/ul × days |
| Total               | 31                       | 18.805                     | 199.830                                          | 35                      | 34.791                     | 329.811                                          |
| ≤25%                | 9                        | 37.003                     | 485.627                                          | 11                      | 40.473                     | 424.962                                          |
| >25% to ≤50%        | 4                        | 41.896                     | 388.809                                          | 7                       | 76.696                     | 831.701                                          |
| >50% to ≤75%        | 6                        | 20.345                     | 269.104                                          | 5                       | 13.111                     | 137.668                                          |
| >75%                | 12                       | 4.025                      | 48.706                                           | 12                      | 19.138                     | 213.441                                          |

AUC<sub>0-28</sub>, area under the curve from time of dose to 28 days; BM, bone marrow; CAR, chimeric antigen receptor.

Shah, et al. ZUMA-3 2-year follow-up treatment subgroup manuscript – *JITC*

**Table S7. Peak and AUC<sub>0-28</sub> CAR T-cell levels in pooled Phase 1 and 2 treated patients by BM blast levels at baseline in patients with and without prior inotuzumab**

| Baseline BM blast % | Prior inotuzumab (Yes) |                            |                                                  | Prior inotuzumab (No) |                            |                                                  |
|---------------------|------------------------|----------------------------|--------------------------------------------------|-----------------------|----------------------------|--------------------------------------------------|
|                     | N                      | Median peak CAR T cells/ul | Median AUC <sub>0-28</sub> CAR T cells/ul × days | N                     | Median peak CAR T cells/ul | Median AUC <sub>0-28</sub> CAR T cells/ul × days |
| Total               | 12                     | 21.034                     | 240.834                                          | 38                    | 19.933                     | 197.987                                          |
| ≤25%                | 2                      | 43.115                     | 480.634                                          | 12                    | 37.632                     | 436.092                                          |
| >25% to ≤50%        | 1                      | 183.501                    | 642.252                                          | 9                     | 59.750                     | 831.701                                          |
| >50% to ≤75%        | 3                      | 31.004                     | 329.811                                          | 6                     | 2.941                      | 46.696                                           |
| >75%                | 6                      | 3.139                      | 41.781                                           | 11                    | 5.689                      | 60.698                                           |

AUC<sub>0-28</sub>, area under the curve from time of dose to 28 days; BM, bone marrow; CAR, chimeric antigen receptor.

Shah, et al. ZUMA-3 2-year follow-up treatment subgroup manuscript – *JITC*

### Supplementary Figures

**Figure S1: Duration of remission (not censored at subsequent alloSCT; A) and relapse-free survival (not censored at subsequent alloSCT; B) in pooled Phase 1 and 2 treated patients by prior number of therapy lines**

alloSCT, allogeneic stem cell transplantation; CR, complete remission; CRi, complete remission with incomplete hematological recovery; mo, month; NE, not estimable; NR, not reached.

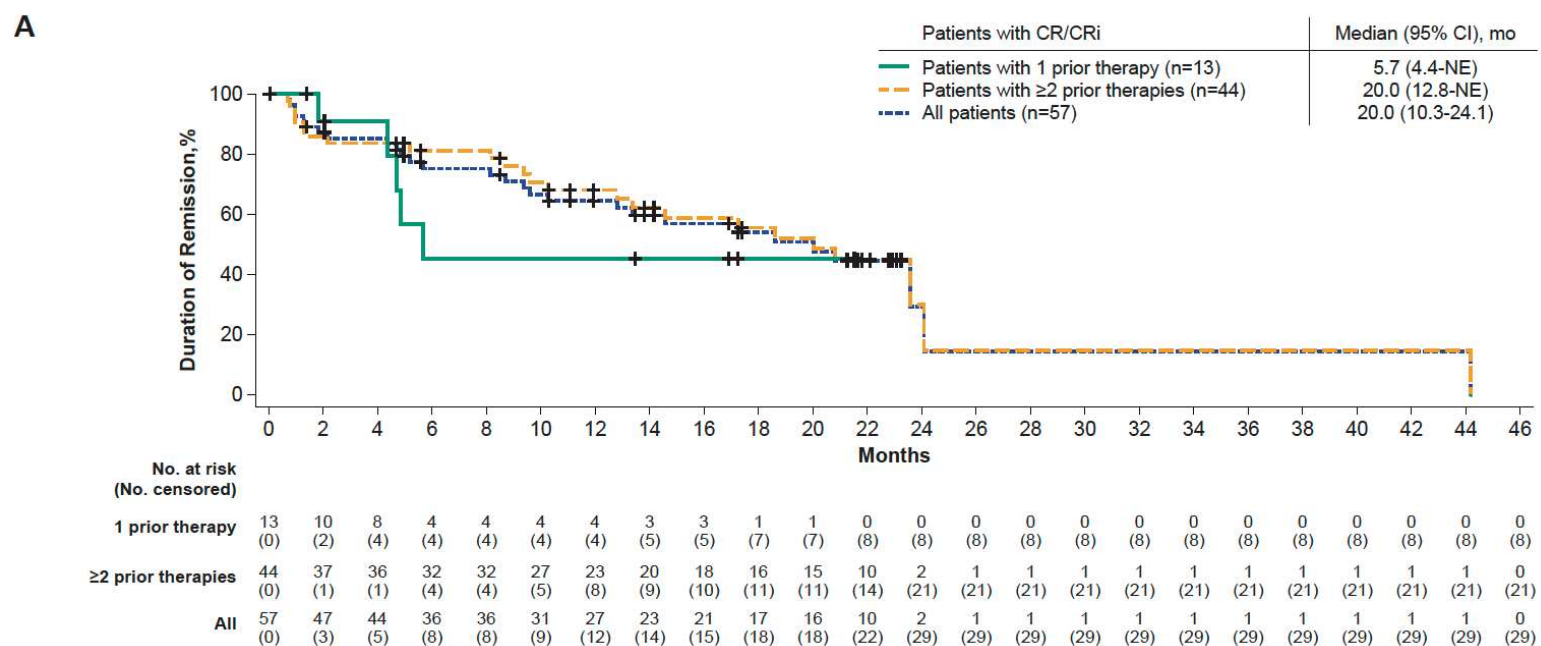

Shah, et al. ZUMA-3 2-year follow-up treatment subgroup manuscript – *JITC*

**B**

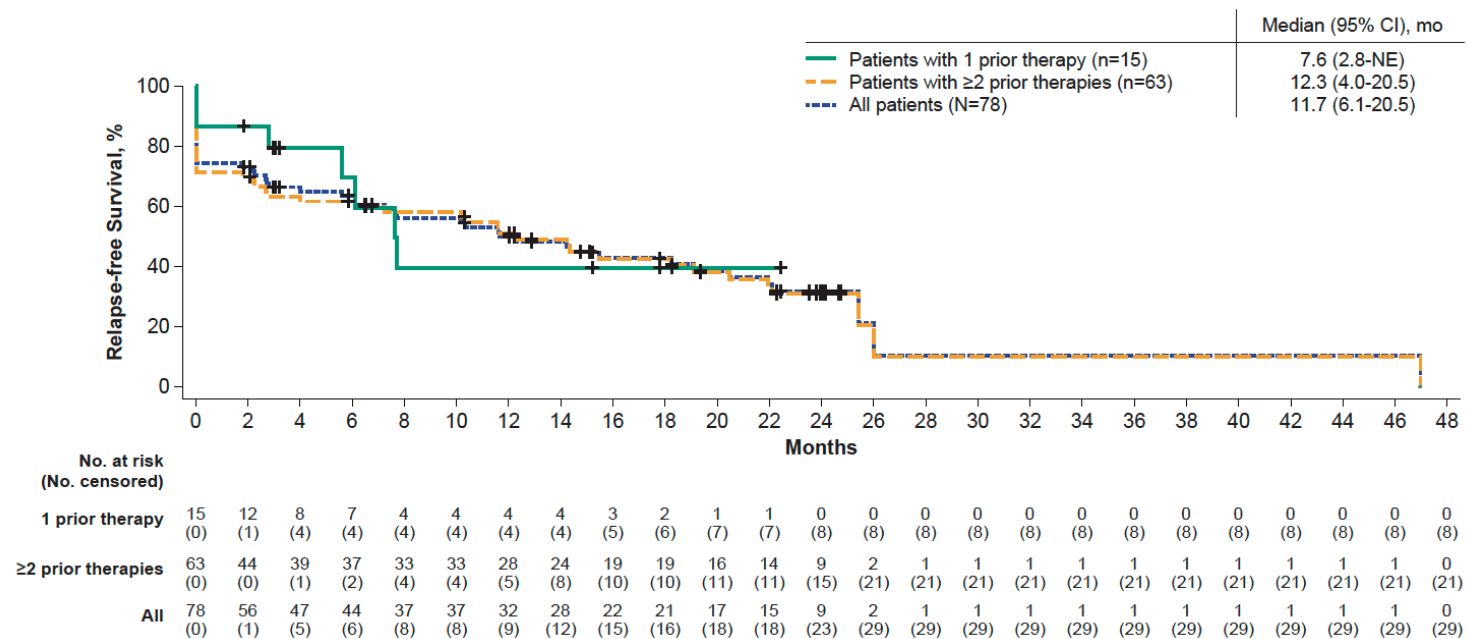

Shah, et al. ZUMA-3 2-year follow-up treatment subgroup manuscript – *JITC*

**Figure S2: Relapse-free survival (censored at subsequent alloSCT) in pooled Phase 1 and 2 treated patients by (A) prior number of therapy lines, (B) prior blinatumomab exposure, (C) prior inotuzumab exposure, and (D) prior alloSCT exposure**  
alloSCT, allogeneic stem cell transplantation; mo, month; NE, not estimable.

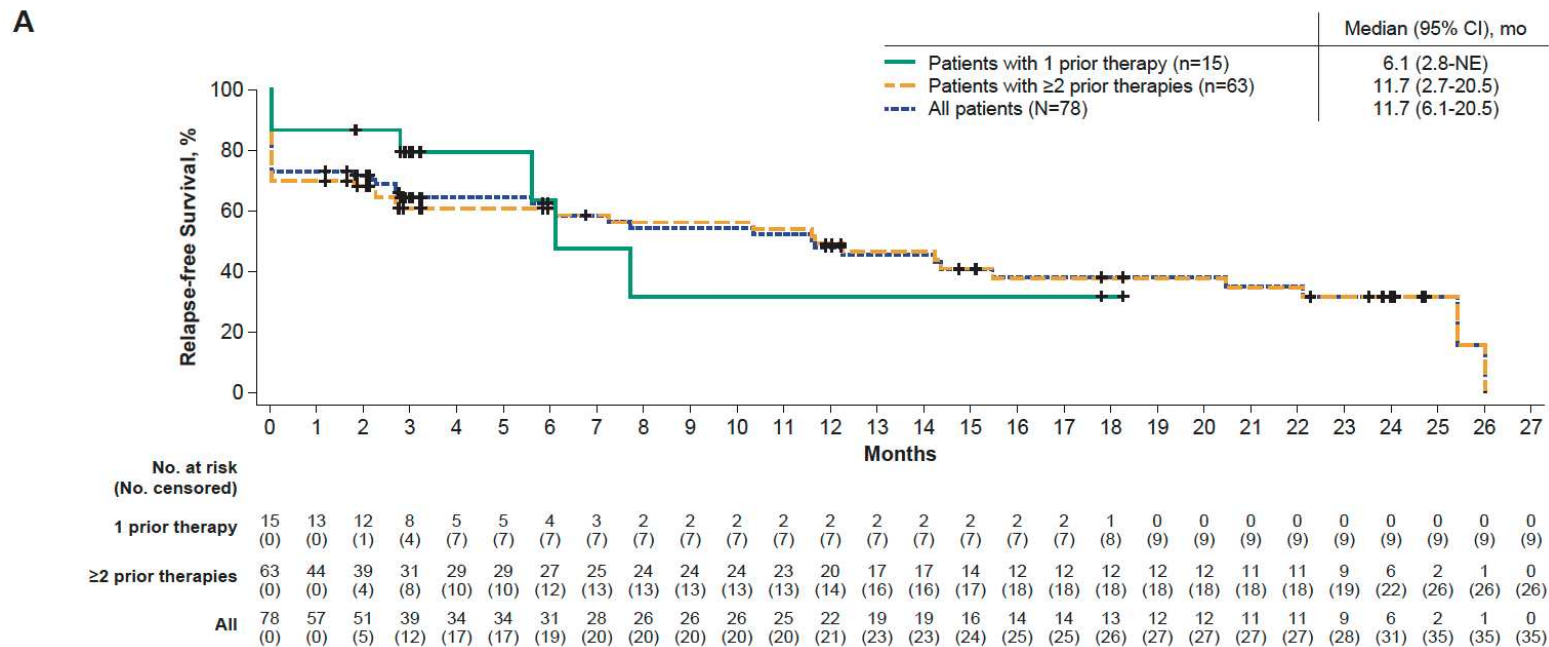

Shah, et al. ZUMA-3 2-year follow-up treatment subgroup manuscript – *JITC*

**B**

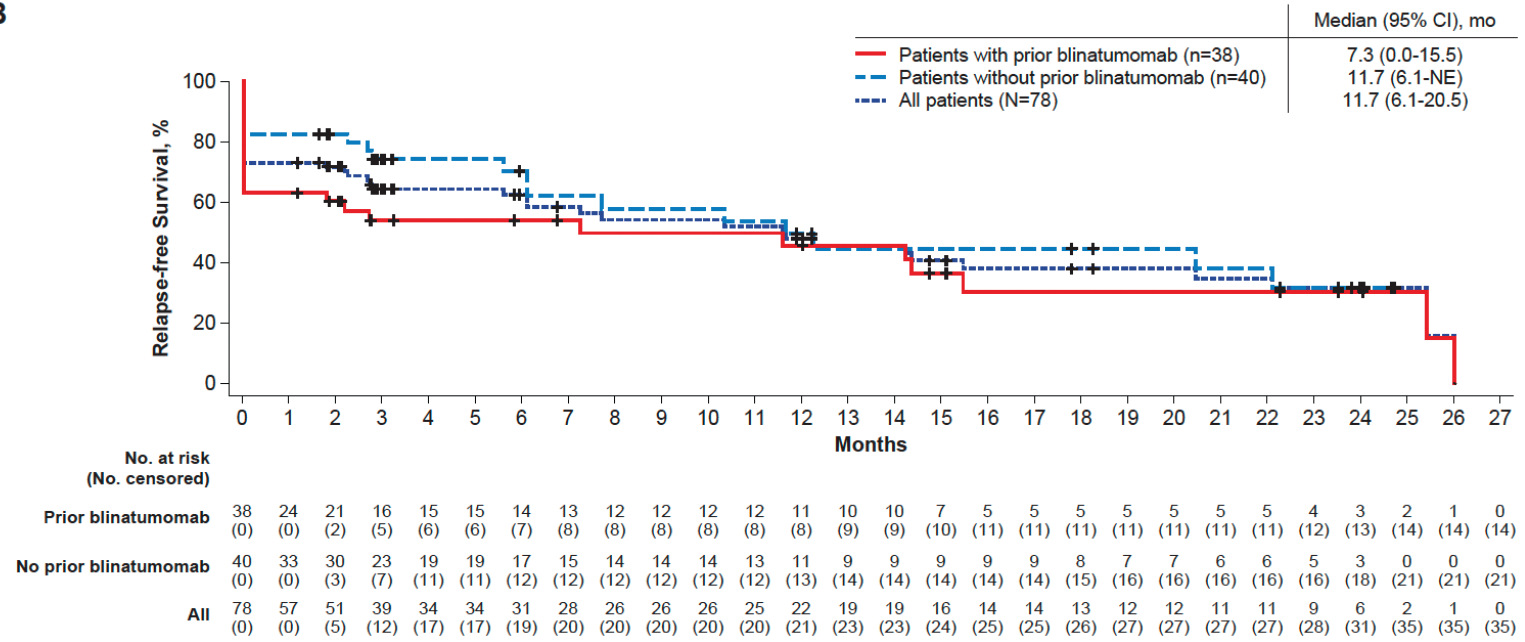

Shah, et al. ZUMA-3 2-year follow-up treatment subgroup manuscript – *JITC*

**C**

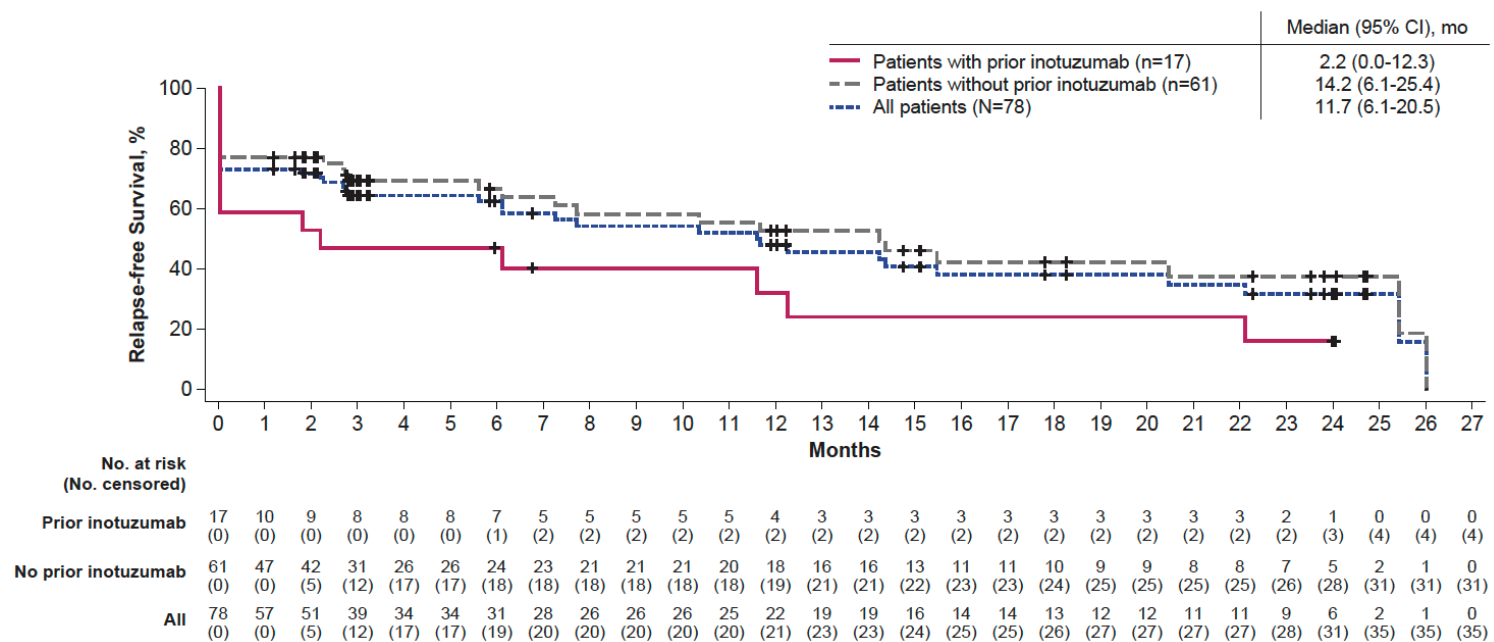

Shah, et al. ZUMA-3 2-year follow-up treatment subgroup manuscript – *JITC*

**D**

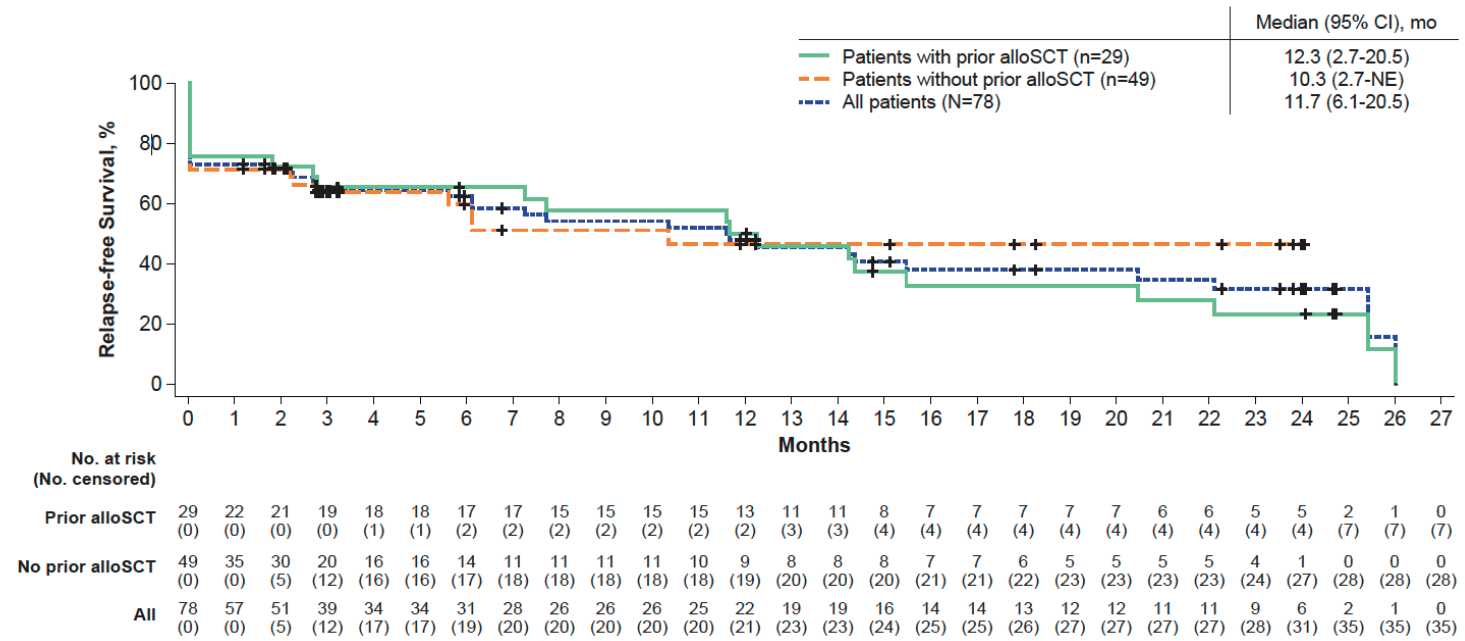



Shah, et al. ZUMA-3 2-year follow-up treatment subgroup manuscript – JITC

**Figure S3: Duration of remission (censored at subsequent alloSCT) in Phase 2 treated patients by (A) prior number of therapy lines, (B) prior blinatumomab exposure, (C) prior inotuzumab exposure, and (D) prior alloSCT exposure**

alloSCT, allogeneic stem cell transplantation; CR, complete remission; CRi, complete remission with incomplete hematological recovery; mo, month; NE, not estimable.

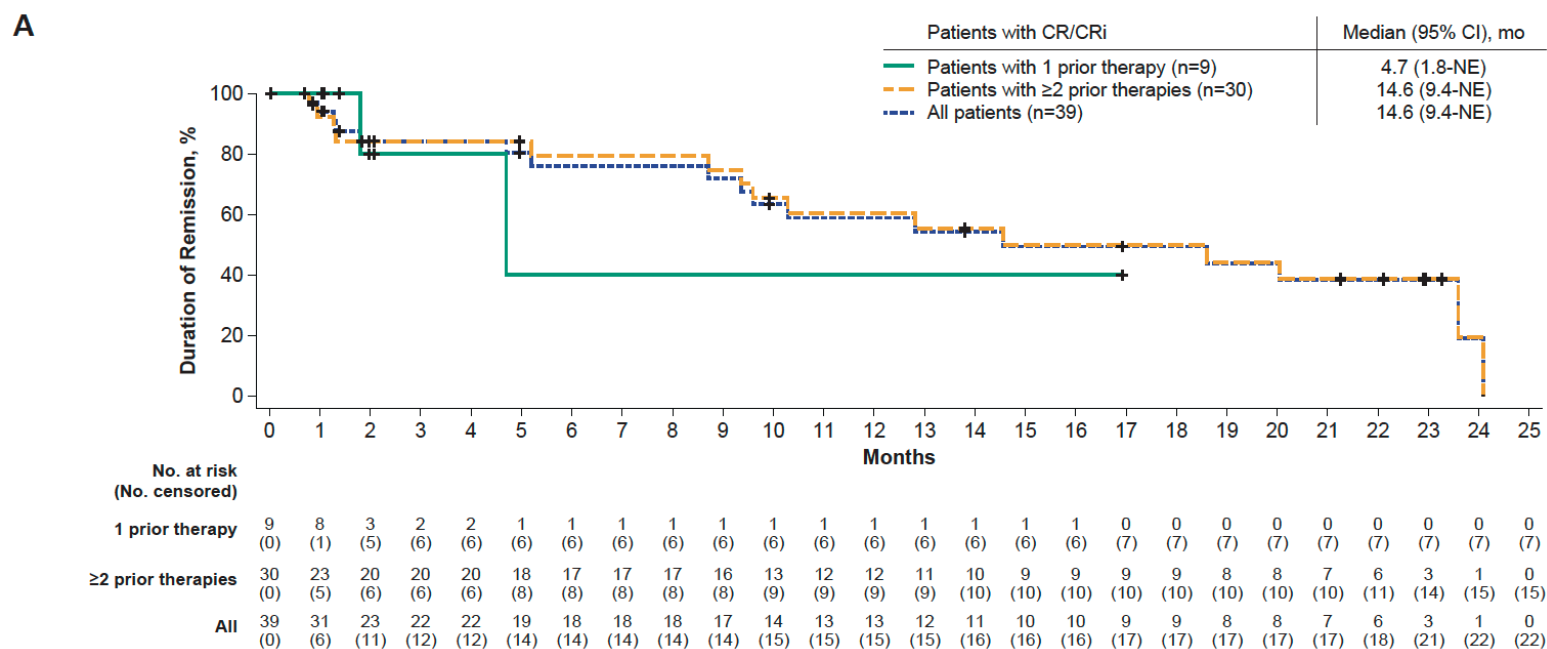

Shah, et al. ZUMA-3 2-year follow-up treatment subgroup manuscript – *JITC*

**B**

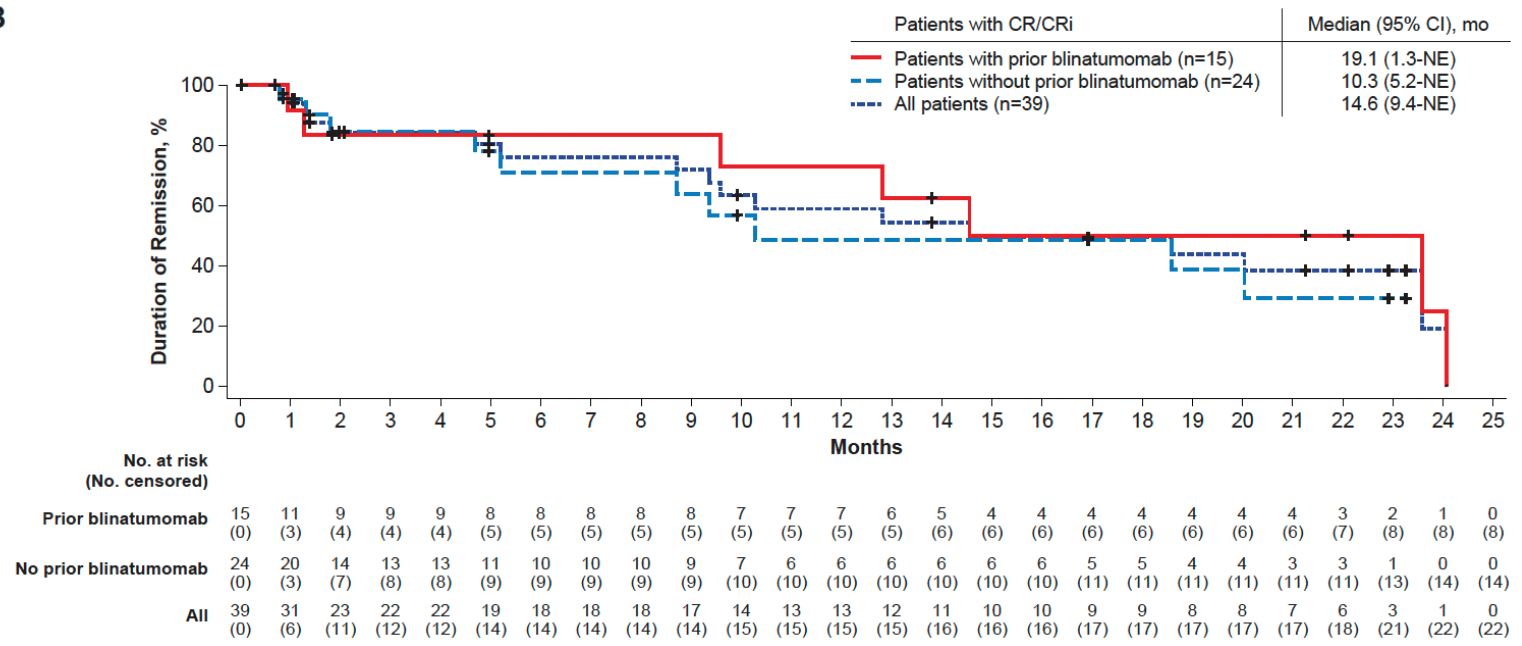

Shah, et al. ZUMA-3 2-year follow-up treatment subgroup manuscript – *JITC*

**C**

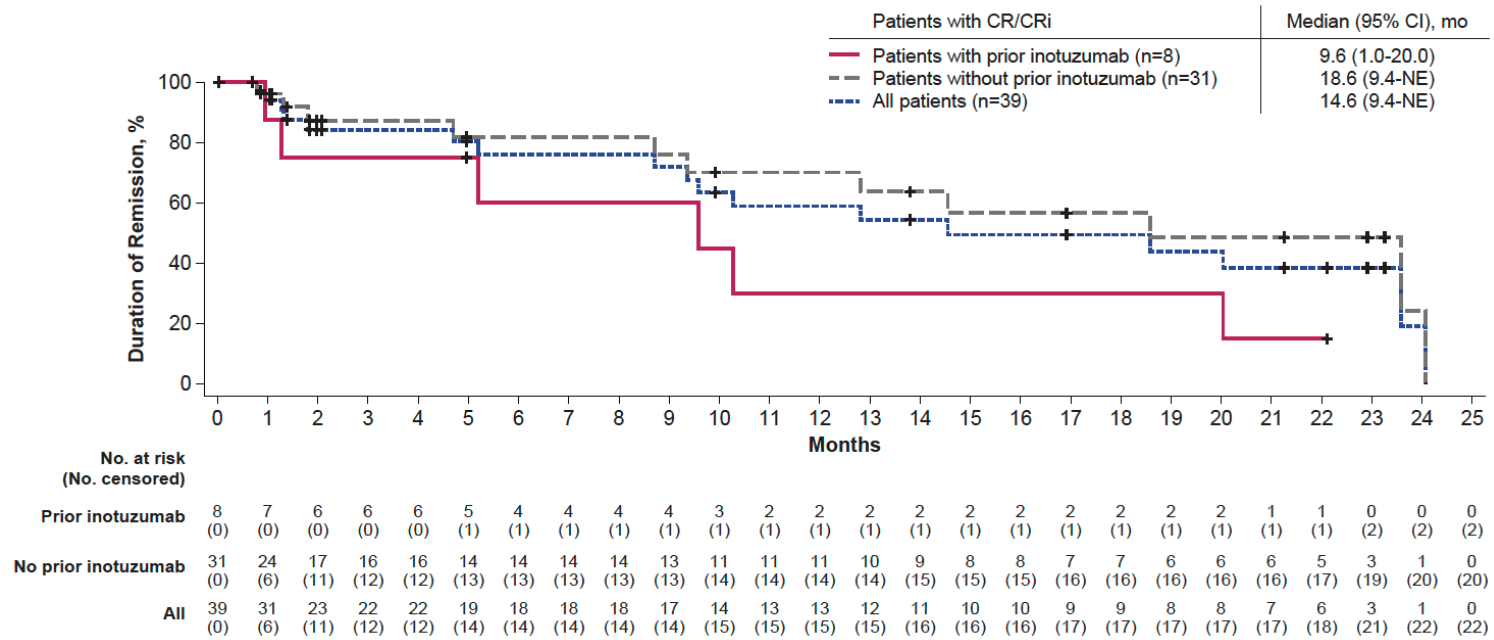

Shah, et al. ZUMA-3 2-year follow-up treatment subgroup manuscript – *JITC*

**D**

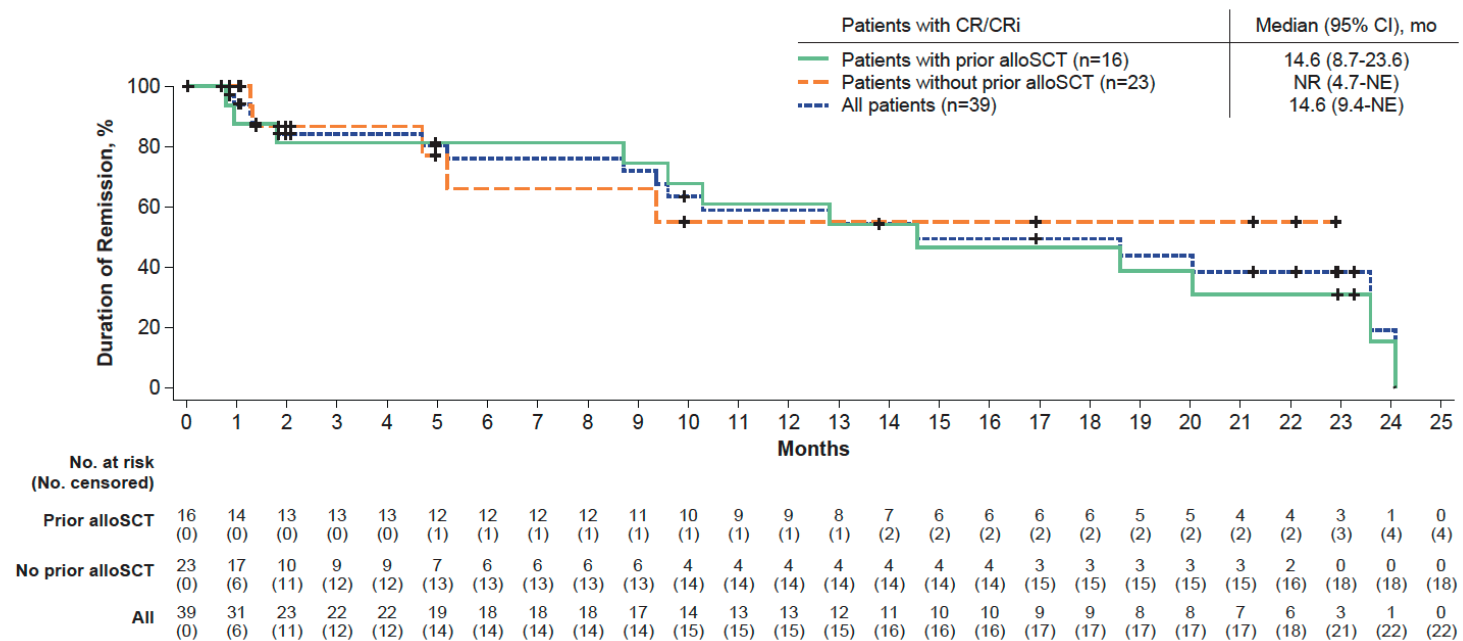

Shah, et al. ZUMA-3 2-year follow-up treatment subgroup manuscript – *JITC*

**Figure S4: Relapse-free survival (censored at subsequent alloSCT) in Phase 2 treated patients by (A) prior number of therapy lines, (B) prior blinatumomab exposure, (C) prior inotuzumab exposure, and (D) prior alloSCT exposure.**

alloSCT, allogeneic stem cell transplantation; NE, not estimable.

**A**

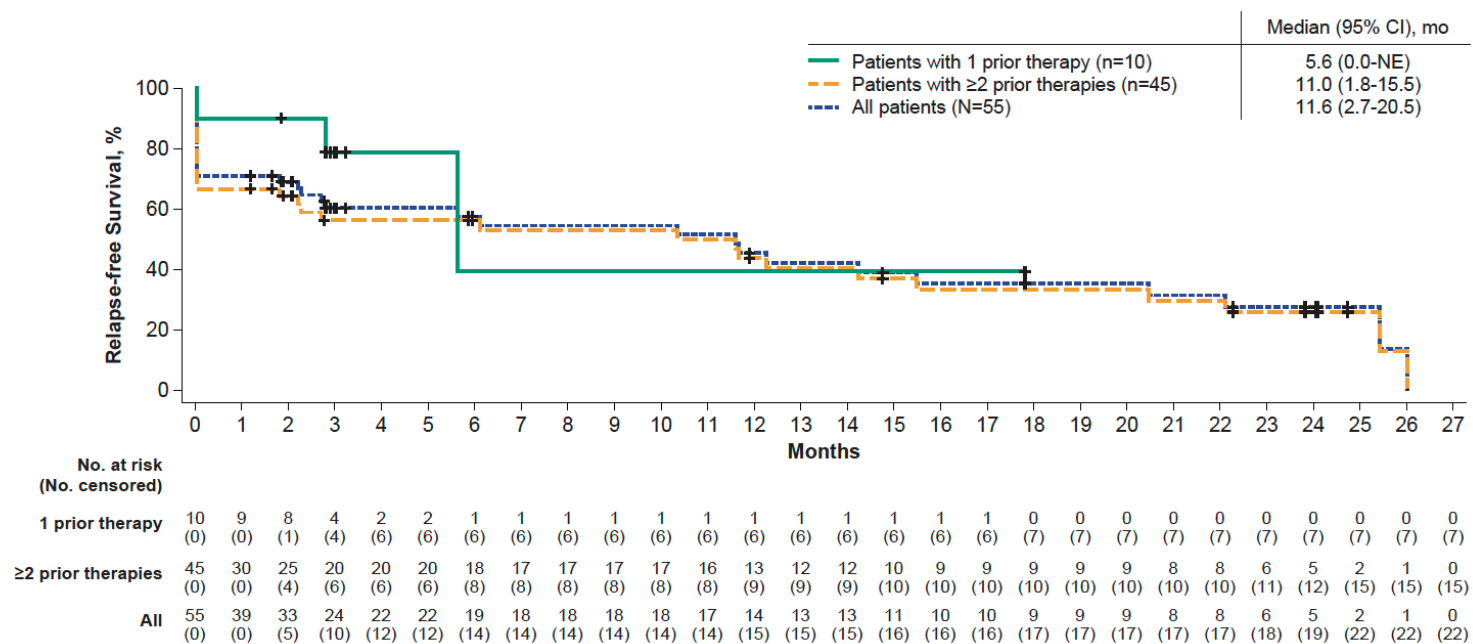

Shah, et al. ZUMA-3 2-year follow-up treatment subgroup manuscript – *JITC*

**B**

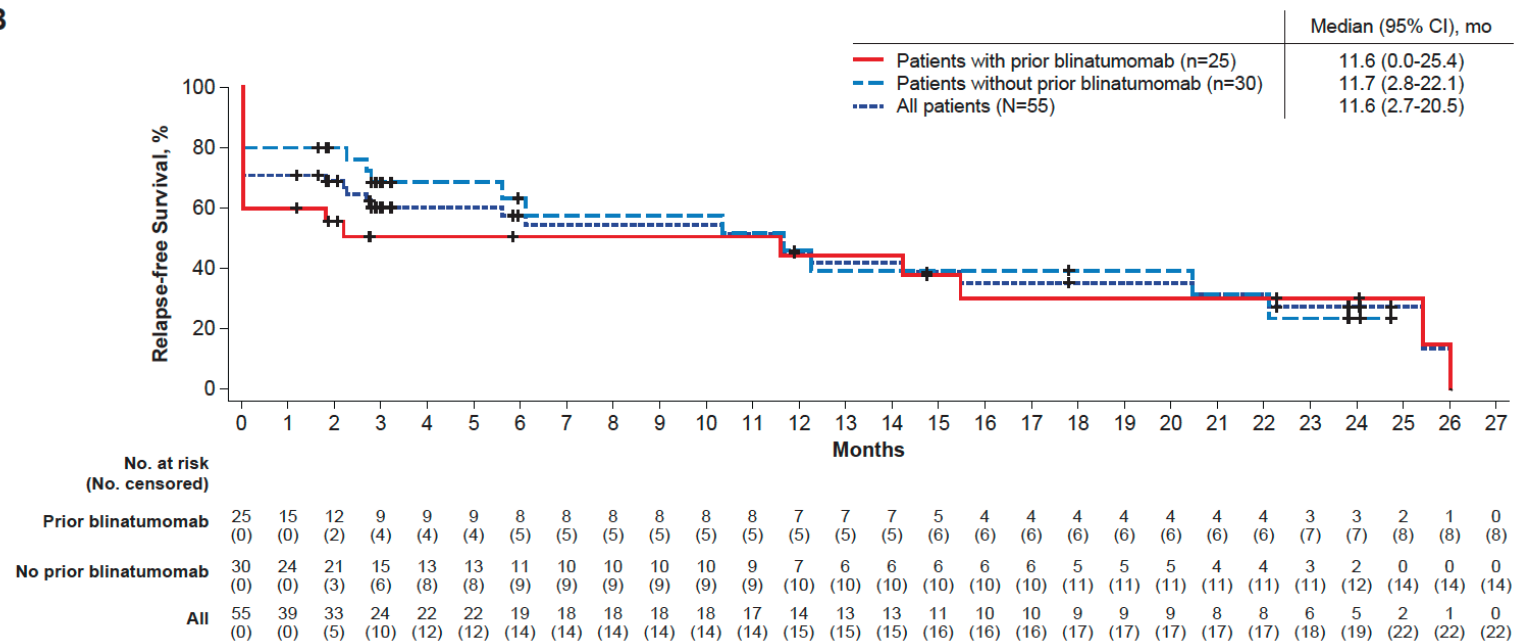

Shah, et al. ZUMA-3 2-year follow-up treatment subgroup manuscript – *JITC*

**C**

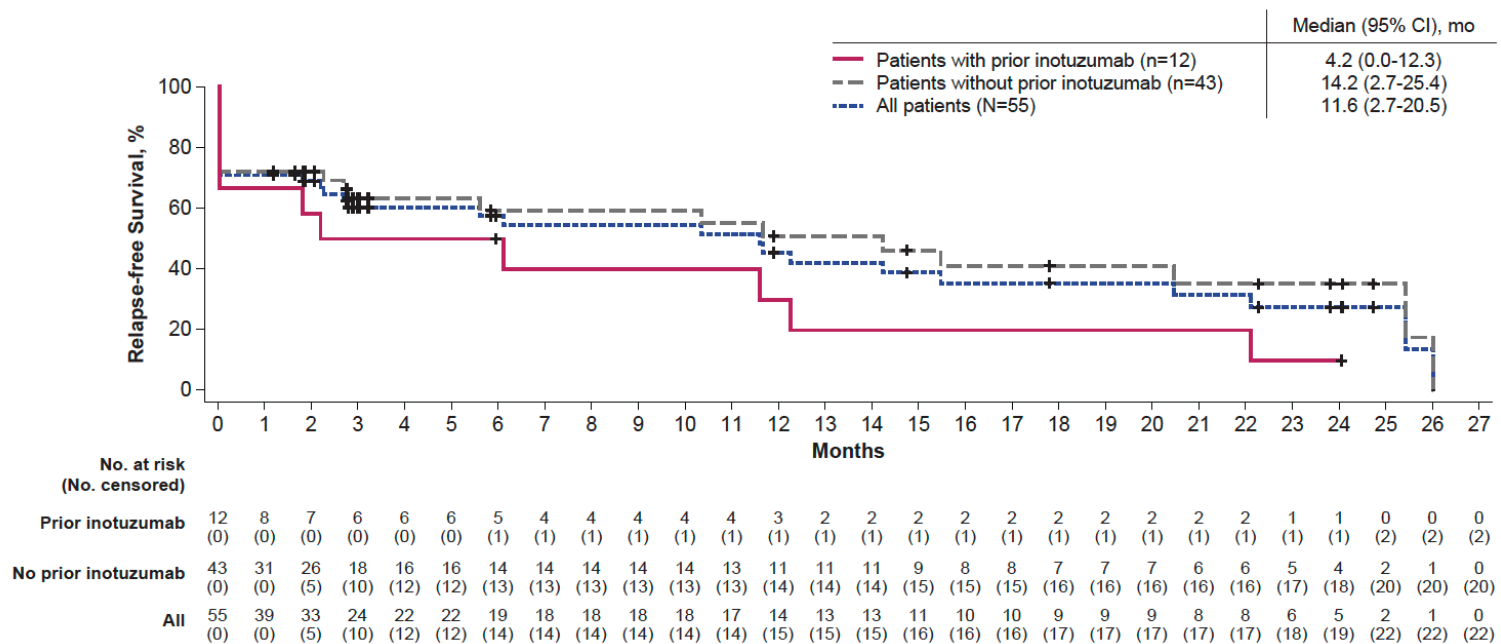

Shah, et al. ZUMA-3 2-year follow-up treatment subgroup manuscript – *JITC*

**D**

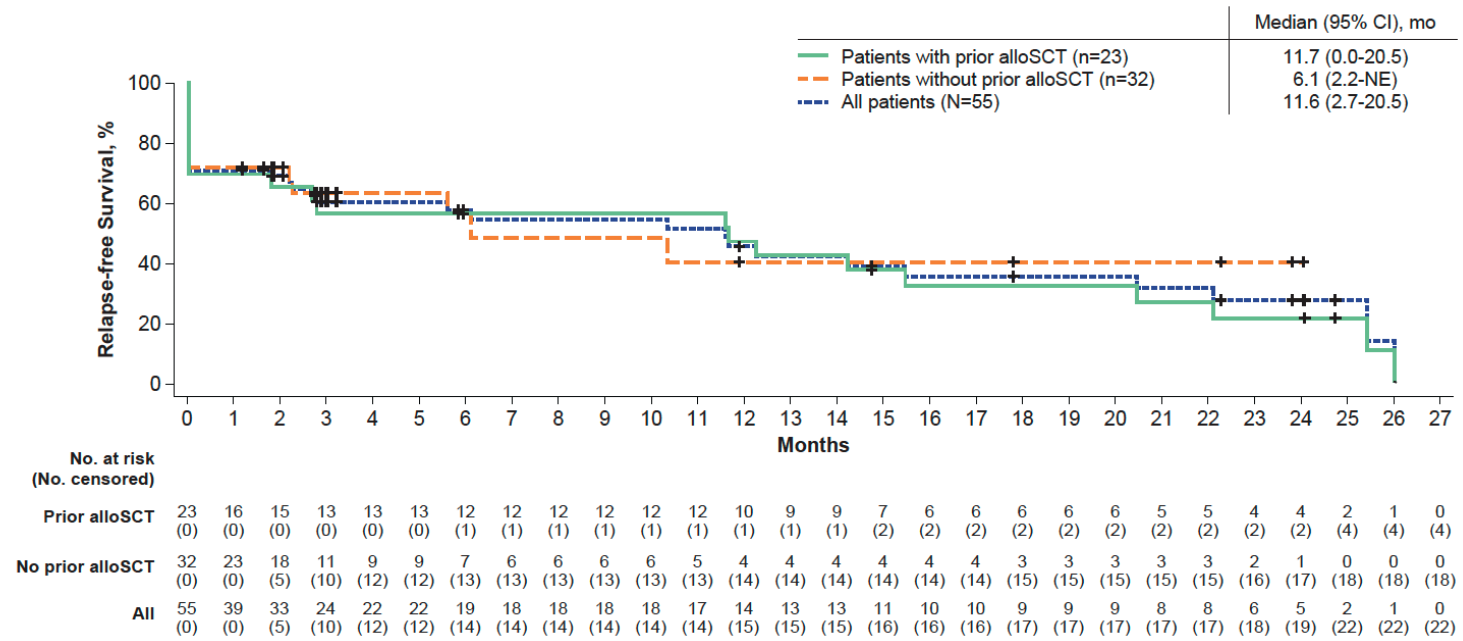







Shah, et al. ZUMA-3 2-year follow-up treatment subgroup manuscript – *JITC*

**C**

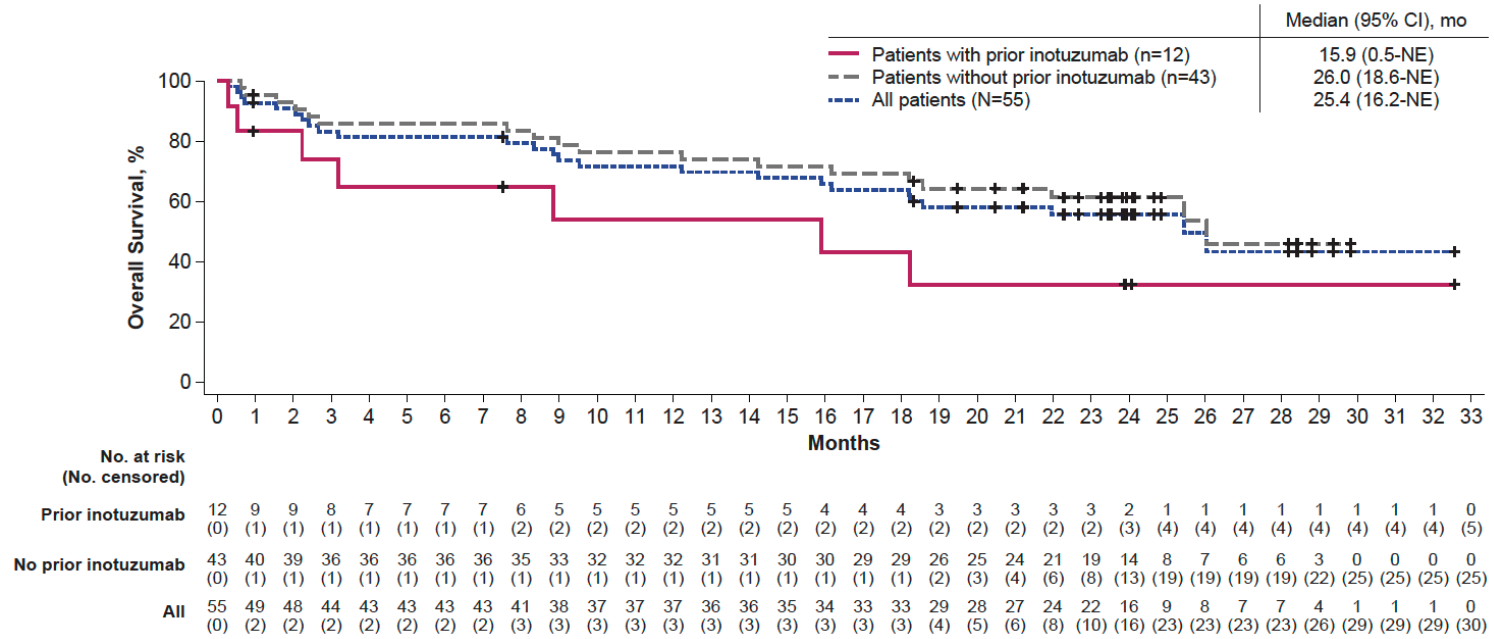

Shah, et al. ZUMA-3 2-year follow-up treatment subgroup manuscript – *JITC*

**D**

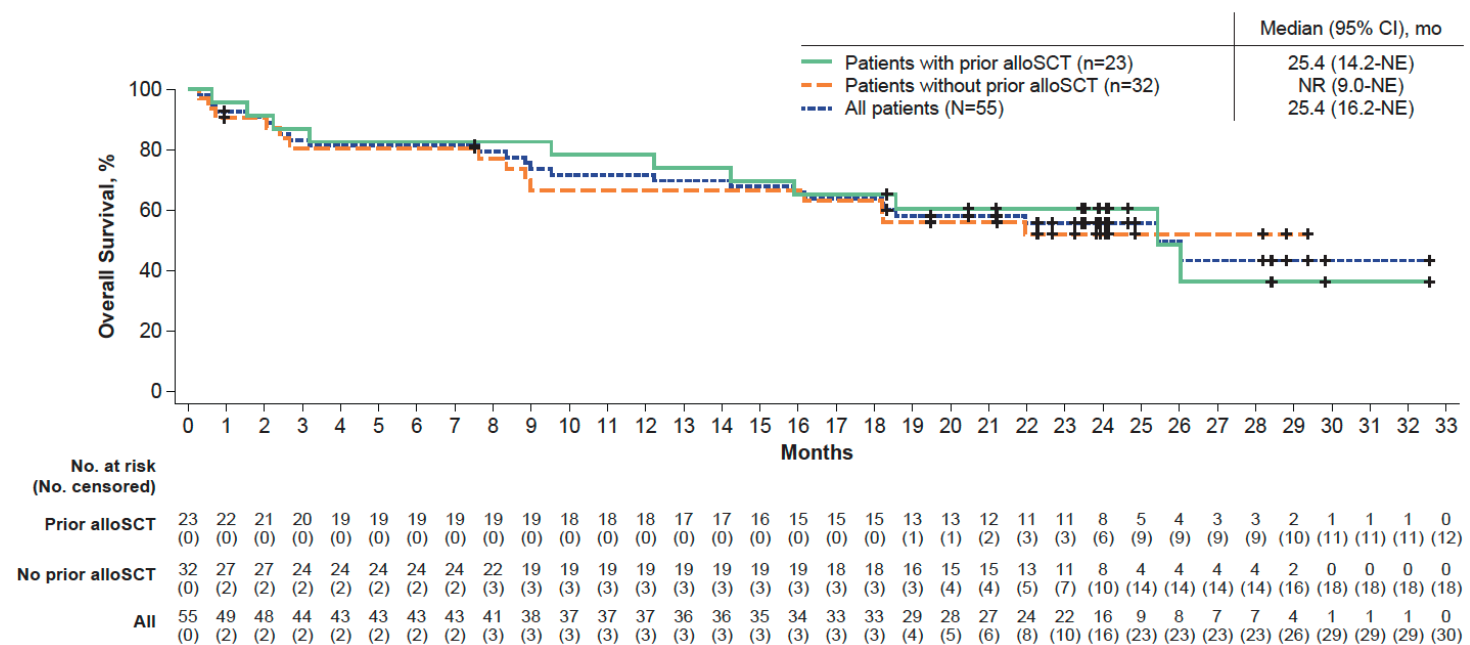

Shah, et al. ZUMA-3 2-year follow-up treatment subgroup manuscript – *JITC*

**Figure S6: Duration of remission (not censored at subsequent alloSCT) and overall survival in Phase 2 treated patients by subsequent alloSCT (A, B) and in Phase 2 treated patients with responses who did not receive prior alloSCT by subsequent alloSCT (C, D)**

alloSCT, allogeneic stem cell transplantation; CR, complete remission; CRi, complete remission with incomplete hematological recovery; mo, month; NE, not estimable.

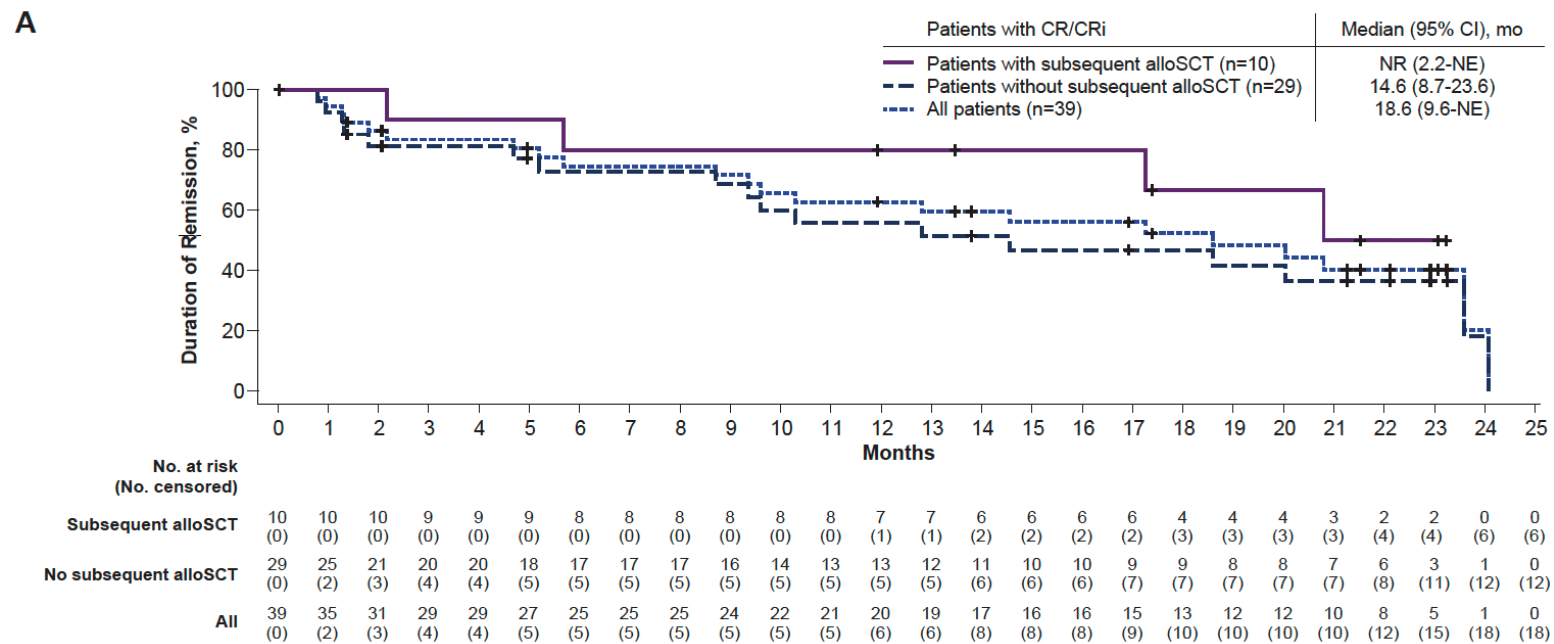



Shah, et al. ZUMA-3 2-year follow-up treatment subgroup manuscript – *JITC*

**C**

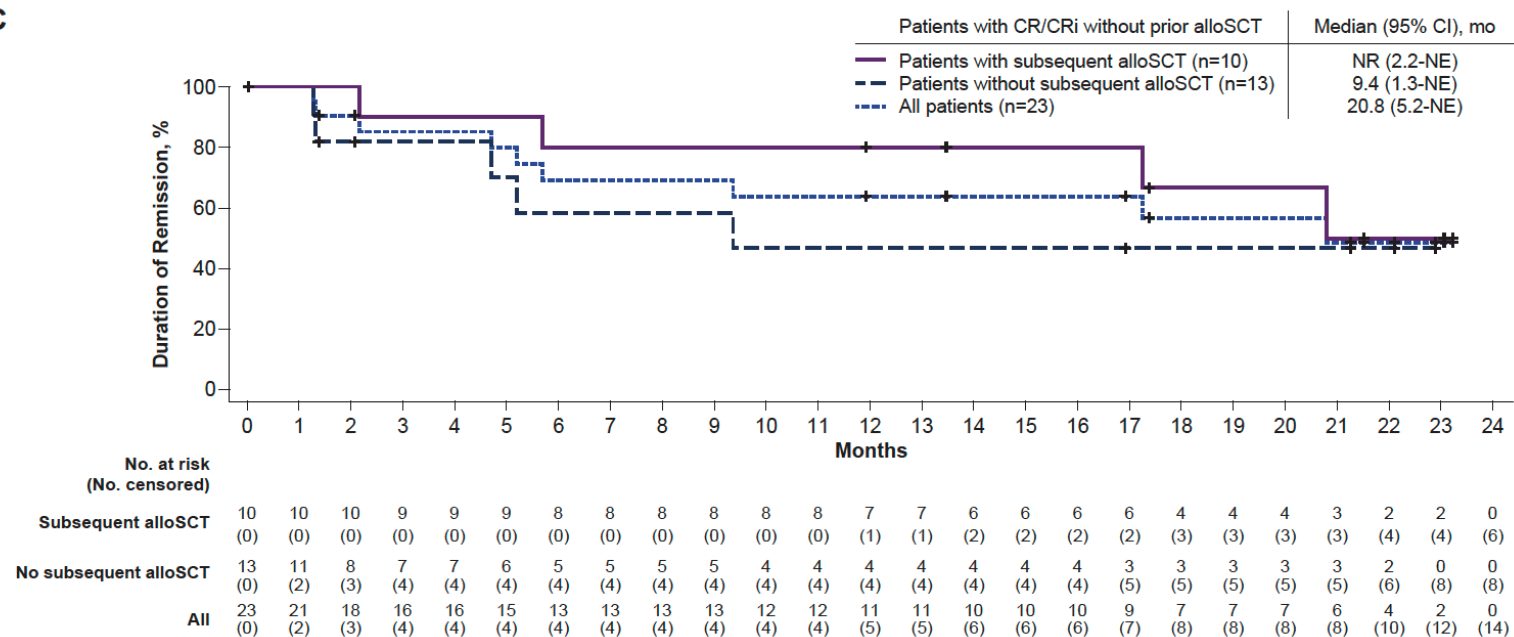





Shah, et al. ZUMA-3 2-year follow-up treatment subgroup manuscript – JITC

**Figure S7: Peak and AUC<sub>0-28</sub> CAR T-cell levels in pooled Phase 1 and 2 treated patients by blinatumomab as last prior therapy**

AUC<sub>0-28</sub>, area under the curve from time of dose to 28 days; CAR, chimeric antigen receptor.

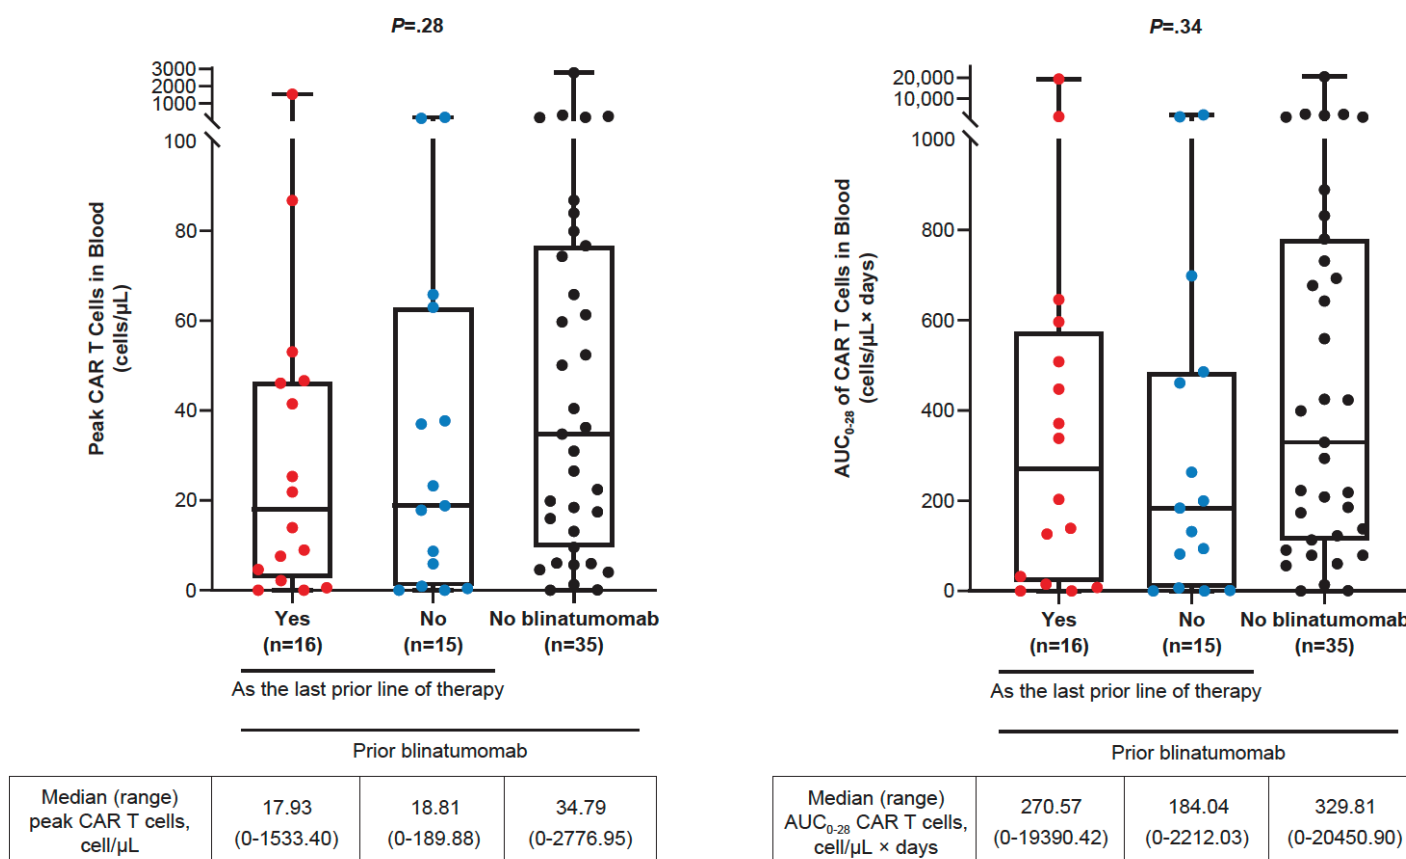

Shah, et al. ZUMA-3 2-year follow-up treatment subgroup manuscript – *JITC*

### **Supplementary References**

1. Shah BD, Stock W, Wierda WG, et al: Phase 1 Results of ZUMA-3: KTE-C19, an Anti-CD19 Chimeric Antigen Receptor (CAR) T Cell Therapy, in Adult Patients with Relapsed/Refractory Acute Lymphoblastic Leukemia (R/R ALL). *Blood* 130:888-888, 2017
2. Shah BD, Ghobadi A, Oluwole OO, et al: KTE-X19 for relapsed or refractory adult B-cell acute lymphoblastic leukaemia: phase 2 results of the single-arm, open-label, multicentre ZUMA-3 study. *Lancet* 398:491-502, 2021
3. Lee DW, Gardner R, Porter DL, et al: Current concepts in the diagnosis and management of cytokine release syndrome. *Blood* 124:188-195, 2014
4. Topp MS, Gokbuget N, Stein AS, et al: Safety and activity of blinatumomab for adult patients with relapsed or refractory B-precursor acute lymphoblastic leukaemia: a multicentre, single-arm, phase 2 study. *Lancet Oncol* 16:57-66, 2015
